# Supplementary material
Source: PubMed Central journal article supplement (PMC5923170)
Supplement: AAC.02501-17_zac005187125s1.pdf [file AAC.02501-17_zac005187125s1.pdf]

# Supplemental Material

## Characteristics of Carbapenemase-Producing *Enterobacteriaceae* in Wastewater Revealed by Genomic Analysis

Ryota Gomi<sup>a,\*</sup>, Tomonari Matsuda<sup>b</sup>, Masaki Yamamoto<sup>c</sup>, Pei-Hsin Chou<sup>d</sup>, Michio Tanaka<sup>c</sup>, Satoshi Ichiyama<sup>c</sup>,  
Minoru Yoneda<sup>a</sup>, and Yasufumi Matsumura<sup>c</sup>

<sup>a</sup>Department of Environmental Engineering, Graduate School of Engineering, Kyoto University, Katsura, Nishikyo-ku, 615-8540, Kyoto, Japan

<sup>b</sup>Research Center for Environmental Quality Management, Kyoto University, 1-2 Yumihama, Otsu, 520-0811, Shiga, Japan

<sup>c</sup>Department of Clinical Laboratory Medicine, Kyoto University Graduate School of Medicine, 54 Shogoin-kawahara-cho, Sakyo-ku, 606-8507, Kyoto, Japan

<sup>d</sup>Department of Environmental Engineering, National Cheng Kung University, No. 1, University Road, Tainan, 70101, Taiwan

\*Corresponding author

E-mail address: gomi.ryota.34v@kyoto-u.jp (R. Gomi)

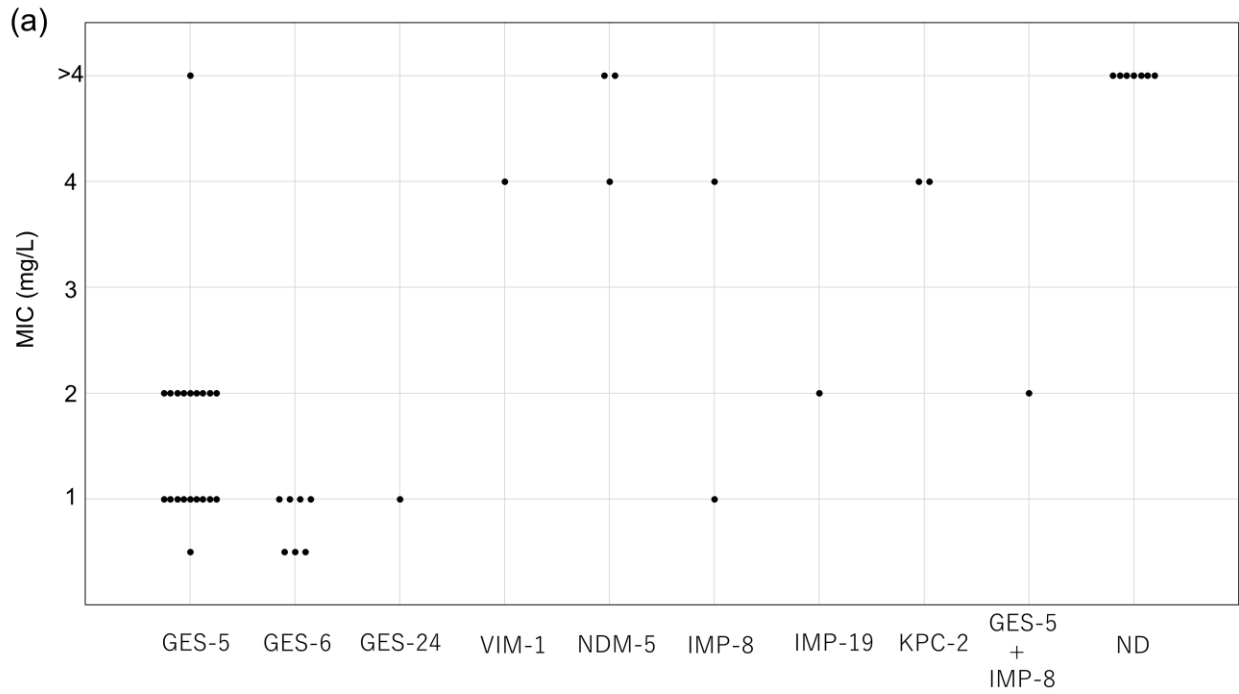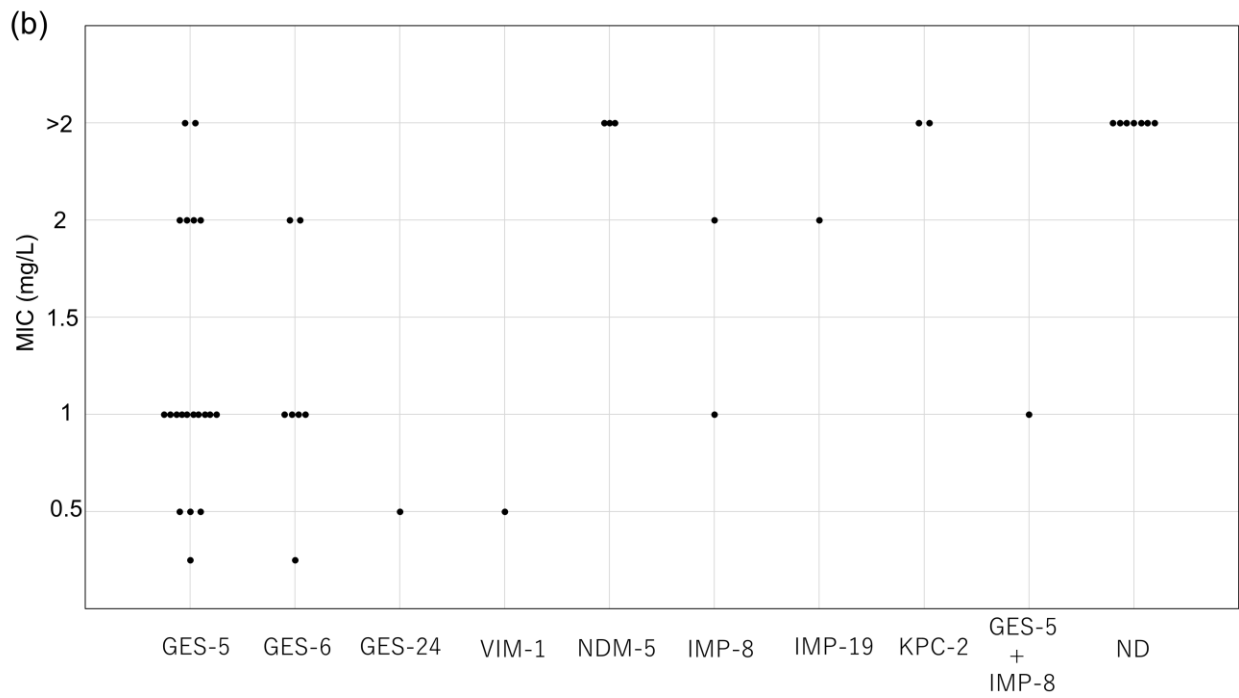

**FIG S1** MICs of (a) imipenem and (b) meropenem for 45 isolates. Types of carbapenemases are shown on the x-axis. CLSI MIC interpretive criteria for imipenem and meropenem are as

follows: susceptible,  $\leq 1$  mg/L; intermediate, 2 mg/L; resistant,  $\geq 4$  mg/L. ND = no carbapenemase-encoding genes were detected for these isolates.

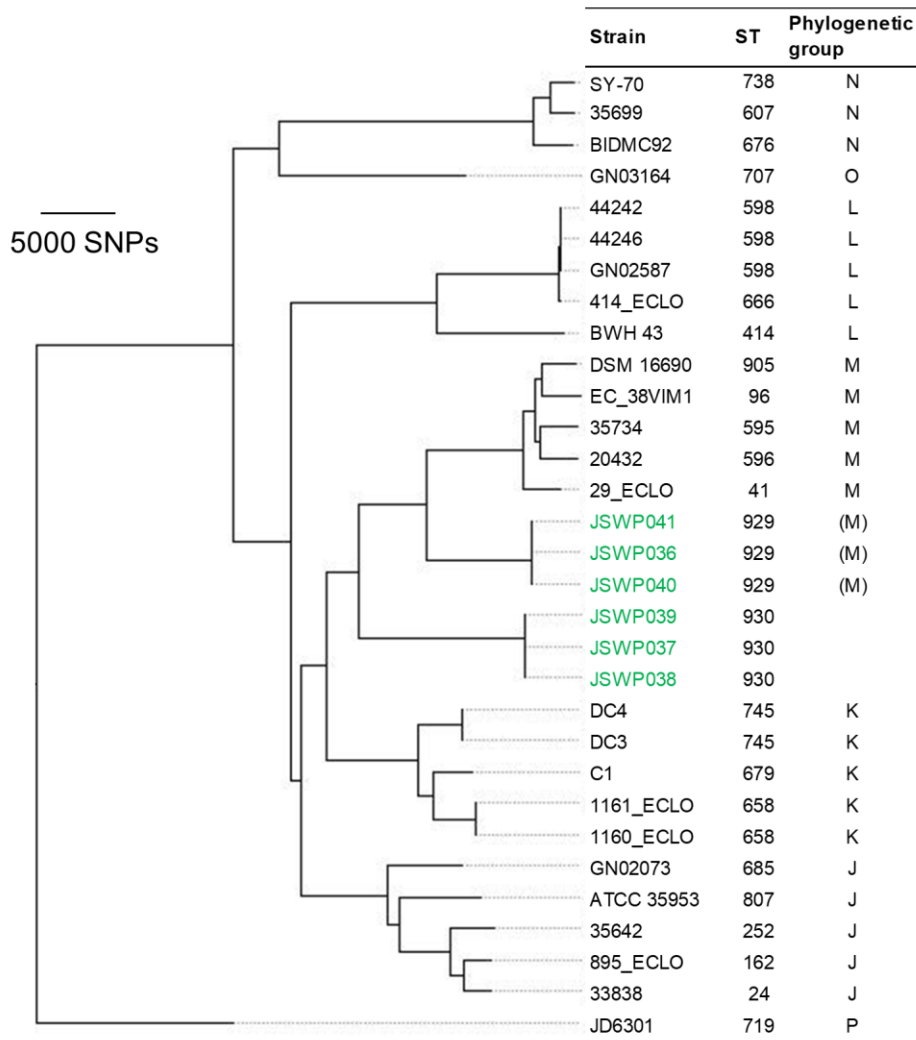

**FIG S2** Phylogenetic tree of strains JSWP036-JSWP041 and reference strains belonging to closely related phylogenetic groups (J, K, L, M, N, O, and P). Strain JD6301 (phylogenetic group P) was used as an outgroup.
